# Supplementary material
Source: publisher figshare collection journal article supplement (https://karger.figshare.com/ndownloader/files/8718037)
Supplement: Supplementary file 1 [file 8718037]

Baseline characteristics of all patients classified according to the revised Atlanta classification

| n (%) | Mild | Moderately Severe | Severe | *p-value mild + mod sev versus severe* |
| --- | --- | --- | --- | --- |
|  | 163 (70.3) | 53 (22.8) | 16 (6.9) |  |
| Gender |  |  |  | *ns* |
| *Male* | 83 (50.9) | 31 (58.5) | 7 (43.8) |  |
| *Female* | 80 (49.1) | 22 (41.5) | 9 (46.2) |  |
| Age | *66 (19-97) IQR 51-77 | *61 (23-92) IQR 49-74 | *74 (31-90) IQR 62-81 | *ns* |
| BMI | *25.7 (15.2-45.4) IQR 23.4-29.8 | *27.6 (17.9-45.2) IQR 24.8-32.0 | *26.1 (13.6-47.0) IQR 24.3-31.0 | *ns* |
| Aetiology |  |  |  |  |
| *Biliary* | 96 (58.9) | 31 (58.5) | 4 (25.0) | *0.009* |
| *Alcohol* | 22 (13.5) | 12 (22.6) | 5 (31.3) | *ns* |
| *Idiopathic* | 16 (9.8) | 5 (9.4) | 5 (31.3) | *0.009* |
| *Other* | 29 (17.8) | 5 (9.4) | 2 (12.4) | *ns* |
| Onset to admission (hours) | *9 (0-72) IQR 3-24 | *12 (0-68) IQR 3-24 | *7 (0-72) IQR 1-20 | *ns* |
| CRP mg/l | *30.5 (1-331) IQR 11-62 | *60 (7-550) IQR 23-152 | *125 (4-339) IQR 63-267 | *0.000* |
| Mortality | 0 | 0 | 5 (31,3) |  |
| ICU | 0 | 6 (11.3) | 13 (81,3) |  |
| Organ failure | 0 | 17 (32.0) | 16 (100) |  |
| MODS | 0 | 1 (1.9) | 14 (87.5) |  |
| * values in median (range) | | | | |
| IQR=Interquartile range | | | | |
| BMI=Body mass index | | | | |
| CRP=CRP level in mg/L upon admission | | | | |
| ICU=Intensive care unit | | | | |
| MODS=Multi organ dysfunction syndrome | | | | |
